# Supplementary material for: An injectable self-healing hydrogel “Trojan Horse” for adjunctive therapy of colon cancer recurrence
Source: Royal Society of Chemistry journal article supplement (doi:10.1039/d1nj04170c), 2021-01-01
Supplement: d1nj04170c1.pdf [file d1nj04170c1.pdf]

## Supporting Information

# An Injectable Self-Healing Hydrogel “Trojan Horse” for Adjunctive Therapy of Colon Cancer Recurrence

*Xilin Bai\**

Beijing National Laboratory for Molecular Sciences, Key Laboratory of Polymer  
Chemistry & Physics of Ministry of Education, Center for Soft Matter Science and  
Engineering, College of Chemistry and Molecular Engineering, Peking University, Beijing  
100871, P. R. China

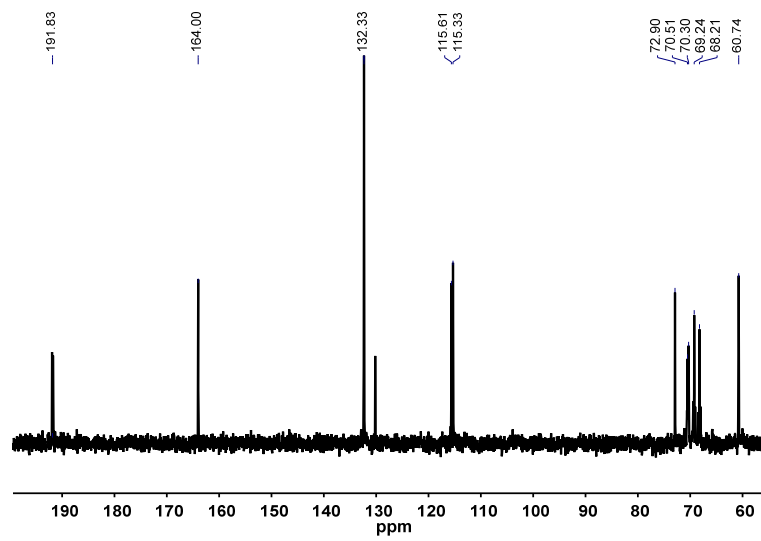

**Fig. S1**  $^{13}\text{C}$  NMR spectrum (DMSO- $d_6$ , 400 MHz) of molecule M1.

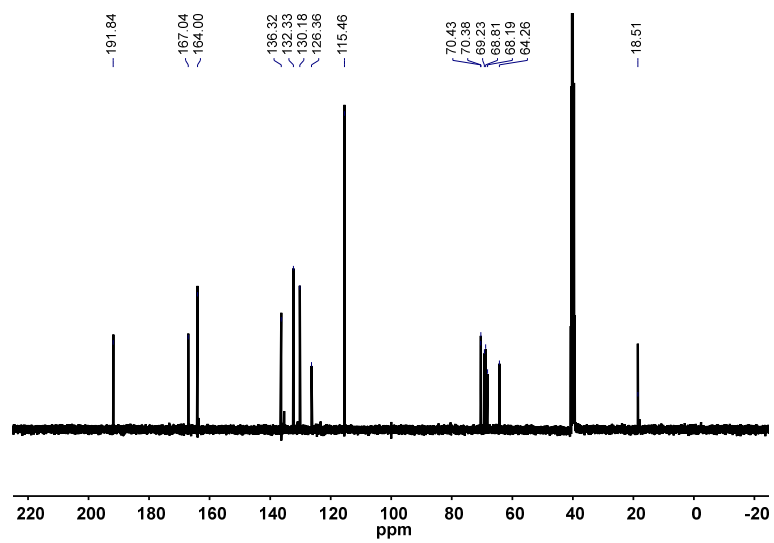

**Fig. S2**  $^{13}\text{C}$  NMR spectrum (DMSO- $d_6$ , 400 MHz) of molecule M2.



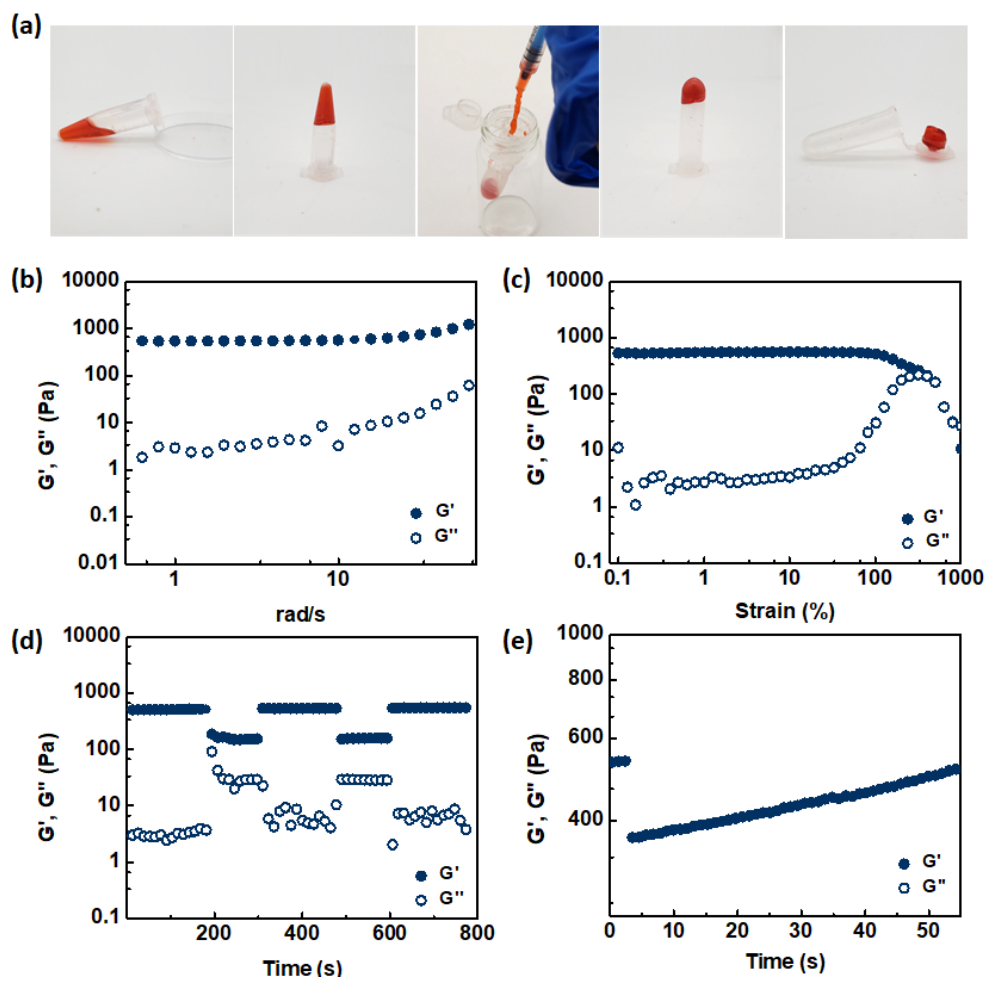

**Fig. S4** (a) Transformation experiment; (b) storage moduli ( $G'$ ) and the loss moduli ( $G''$ ) during gelation process; (c)  $G'$ ,  $G''$  on strain sweep (strain% 0.1~1000); (d) step-changing tests; (e) self-healing process of the DOX-loaded hydrogel.

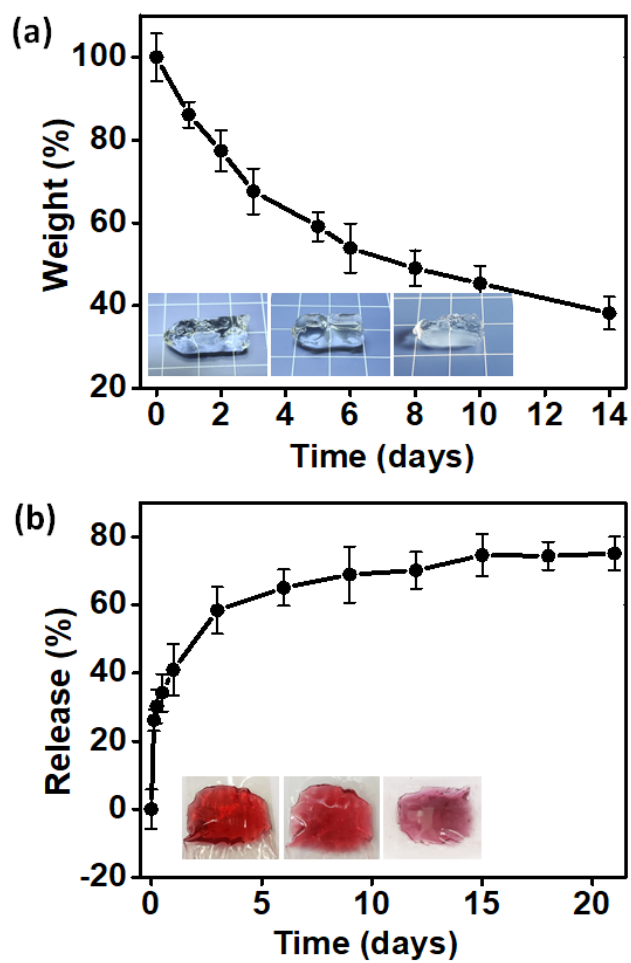

**Fig. S5** *In vitro* degradation of the hydrogel (a) and controlled release of DOX (b) from the hydrogel, mean  $\pm$  SD ( $n = 6$ ).

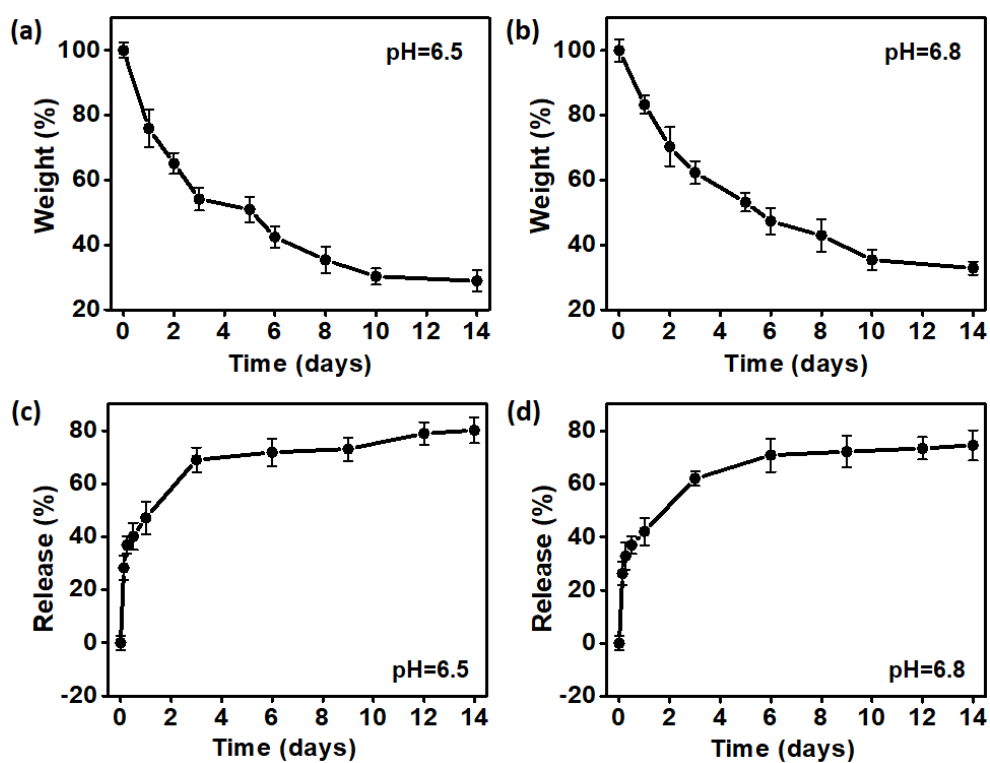

**Fig. S6** *In vitro* degradation of the hydrogel and controlled release of DOX from the hydrogel under pH=6.5 (a, c) & 6.8 (b, d), mean  $\pm$  SD ( $n = 6$ ).

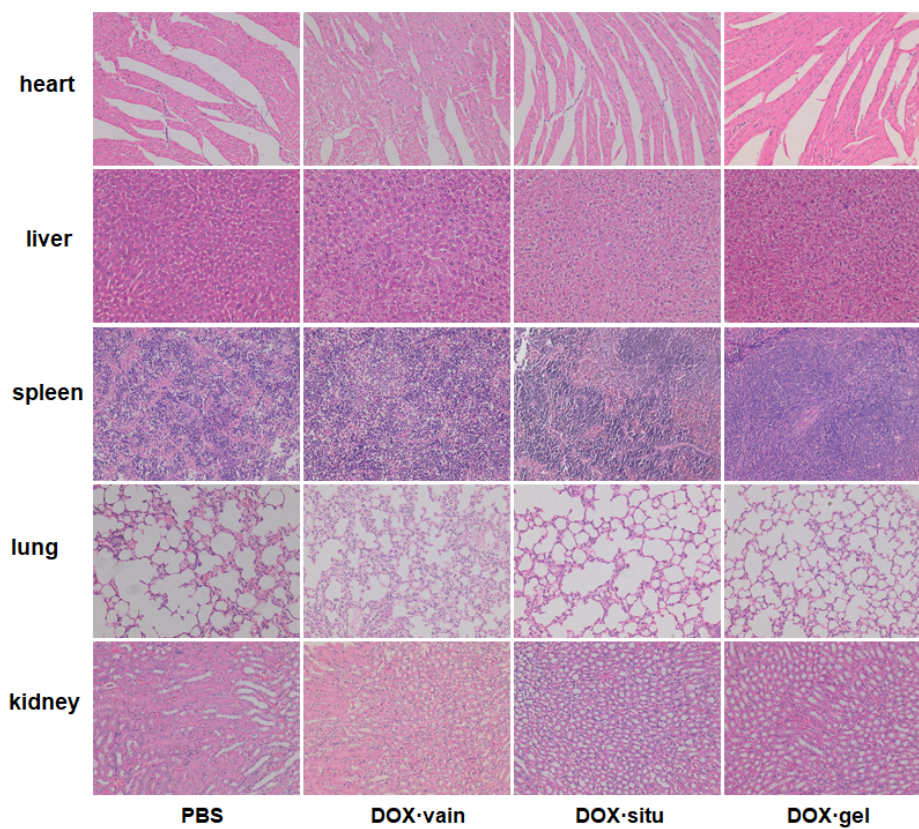

**Fig. S7** H&E staining of dissected organs including heart, liver, spleen, lung and kidney on day 14 for PBS, DOX·vain, DOX·situ and DOX·gel group.



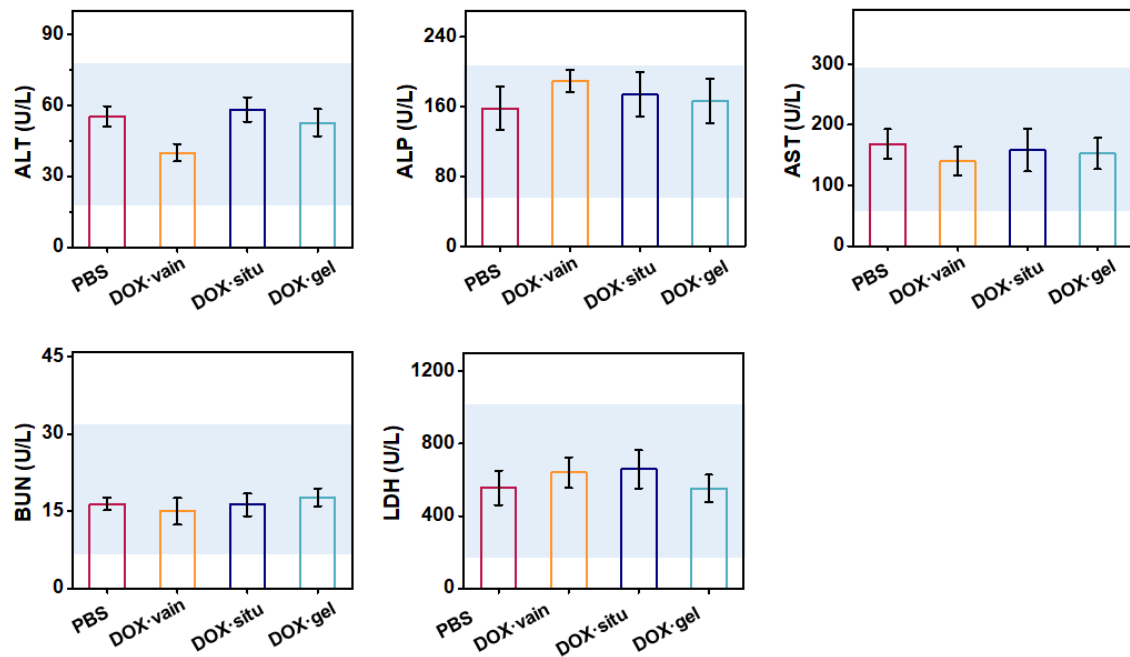

**Fig. S8** Biosafety evaluation via serum biochemical parameter detection. All the markers including aspartate aminotransferase (AST), alanine aminotransferase (ALT), blood urea nitrogen (BUN), lactic dehydrogenase (LDH), and alkaline phosphatase (ALP) were within normal ranges, mean  $\pm$  SD ( $n = 6$ ).
